# Supplementary figures and images for: Using a Label-free Proteomics Method to Identify Differentially Abundant Proteins in Closely Related Hypo- and Hypervirulent Clinical Mycobacterium tuberculosis Beijing Isolates
Source: PubMed Central journal article supplement — Mol Cell Proteomics. 2010 Feb 26;9(11):2414–23. doi: 10.1074/mcp.M900422-MCP200 (PMC2984234; doi:10.1074/mcp.m900422-mcp200), 2010-02-26

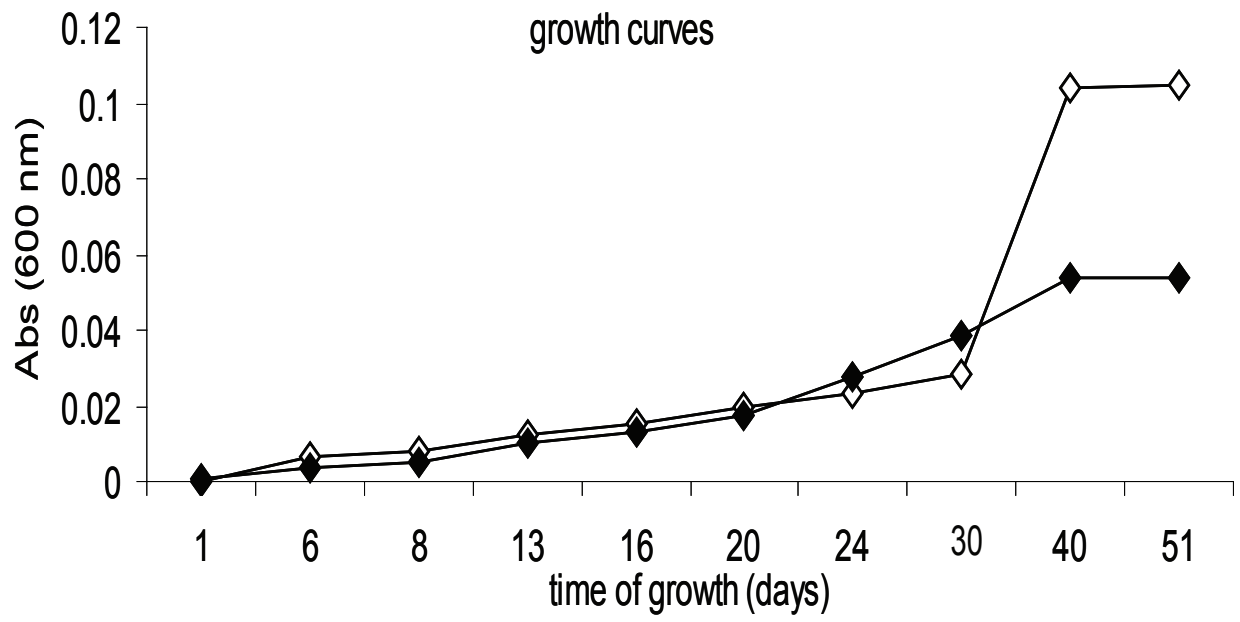

Supplement: supp_M900422-MCP200_Supp_Fig1.pdf [file supp_M900422-MCP200_Supp_Fig1.pdf]

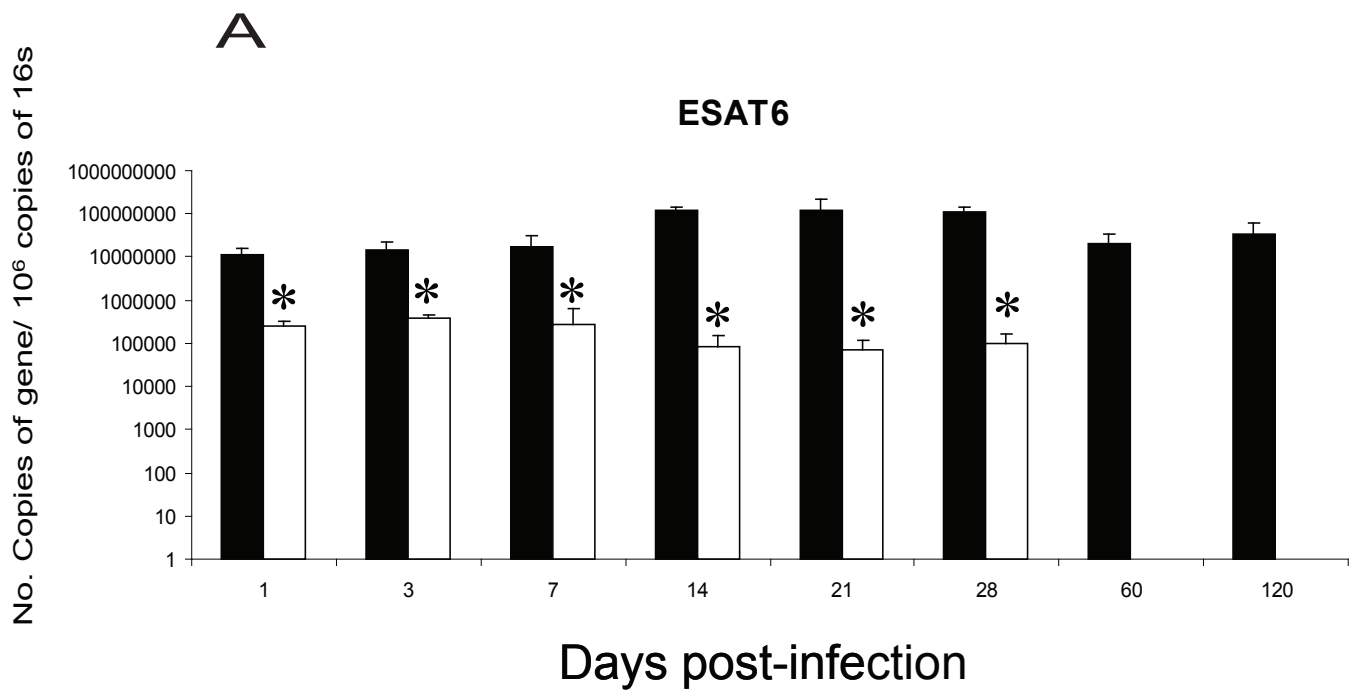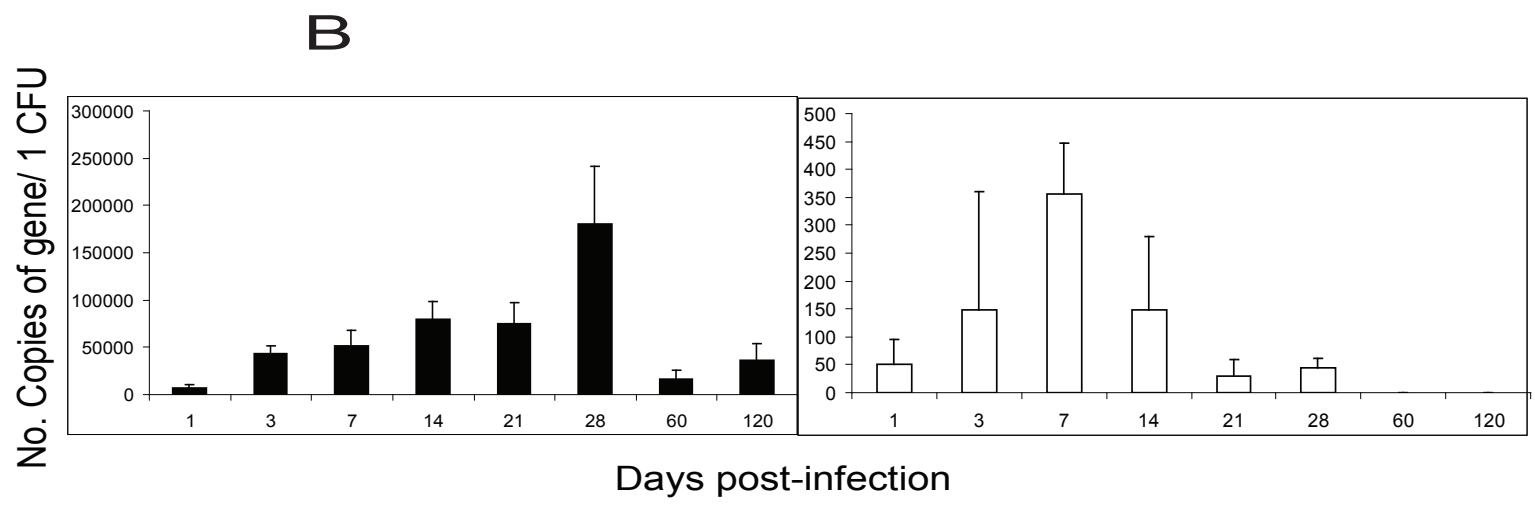

Supplement: supp_M900422-MCP200_Supp_Fig2.pdf [file supp_M900422-MCP200_Supp_Fig2.pdf]
